# Supplementary material for: Epigenetic clock analysis of human fibroblasts in vitro: effects of hypoxia, donor age, and expression of hTERT and SV40 largeT
Source: publisher site journal article supplement (doi:10.18632/aging.101955), 2019-05-21
Supplement: Supplementary file [file aging-v11i10-101955-supplementary-material-SD1.pdf]

**SUPPLEMENTARY FIGURE**

Original Raw data of HIF1 $\alpha$  Western blot

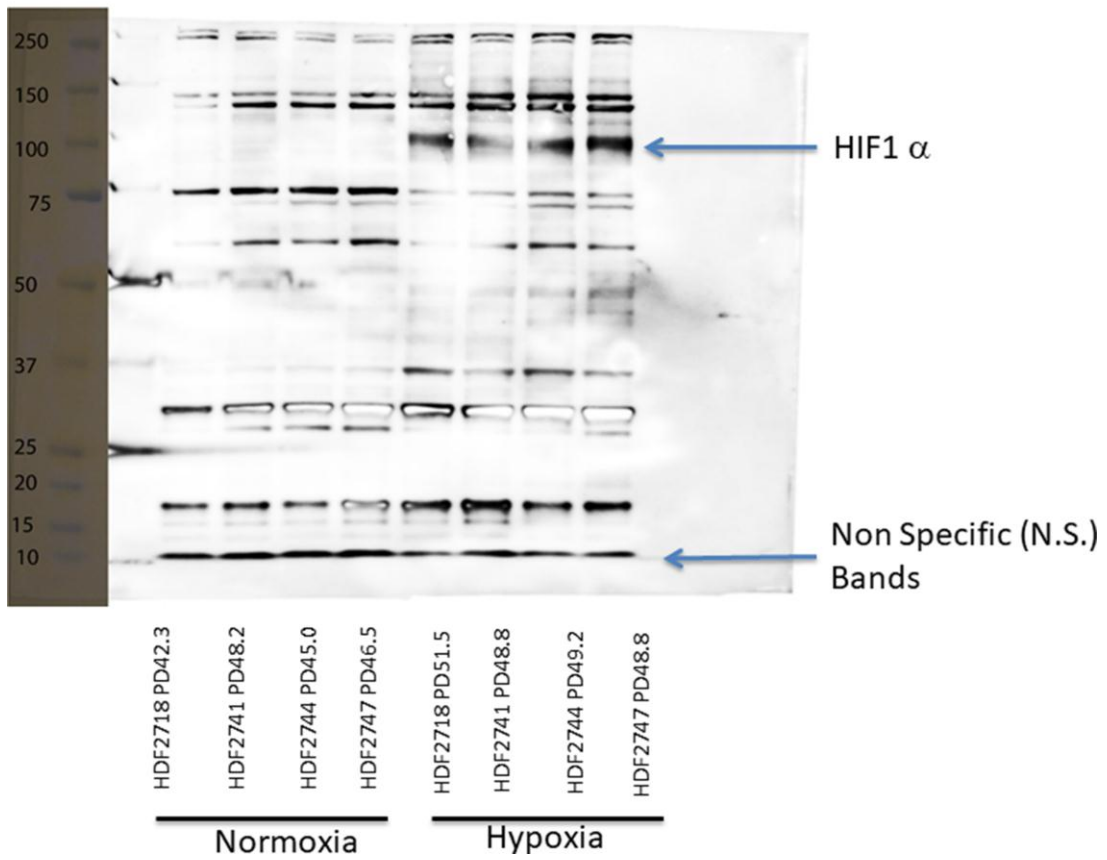

Supplementary Figure 1.
